# Supplementary material for: Missense variants in KATNA1 alter microtubule dynamics and underlie dominant macular dystrophy
Source: Research Square preprint supplement (doi:10.21203/rs.3.rs-8880283/v1), 2026-07-07
Supplement: Supplementary file 1 [file 2aff249e0865f99e2ad950b5.xlsx]

## Sheet: Table S1
Table S1. Detailed clinical features of affected individuals from study cohort.
Family ID	Subject original IDs	Subject Study ID	Sex	Recruiting research center	Ethnicity	Family relationship	Inheritance pattern	Variant ID	Age at diagnosis (years)	Refraction (spherical equivalent)	Ocular symptoms	BCVA (Snellen, decimal) OD/OS	Laterality	Symmetrical fundus features	Fundus classification	Fundus description	Autofluorescence description	Optic neuropathy	Symmetrical OCT features	OCT classification	Full-field ERG	Other ocular features	Additional medical history
Family 1	MDS337	S1	M	Germany	European	proband	isolated	M1	62	61yo: OD: +1.75, OS: +1.38; 62yo: OD: +2.12, OS: +2.25	reduced VA, light sensitivity	0.8/1.0 (61yo); 0.5/0.8 (62yo)	OU	OD more affected than OS	Type 2 (OD), Type 1 (OS)	OD: large, round, yellowish deposits in the macula and temporal retina. OS: large, reticular, greyish macular deposits	OU: macular hypoautofluorescent area (OU), OD: hyperautofluorescent lesion along the inferior arcade	no	yes	Type 2	not performed	none	arterial hypertension
Family 2	ITAPR-046	S2	M	Italy	Bangladeshi	proband	dominant	M2	25	OD: -1.25, OS: -1.00	currently asymptomatic	0.8/1.0	OU	yes	Type 1	Small, pinpoint, yellowish deposits in the macula	NA	no	yes	Type 1	not performed	none	none
Family 2	ITAPR-047	S3	F	Italy	Bangladeshi	mother	dominant	M2	42	OD: not performed, OS: +1.75	currently asymptomatic	1.0/1.0	OU	yes	Type 1	Faint, yellowish deposits in the macula	NA	no	yes	Type 1	not performed	none	none
Family 2	D5078	S4	M	Canada	Bangladeshi	uncle	dominant	M2	67	not documented	currently asymptomatic	NA	OU	yes	Type 2	Medium, round to pisciform, yellowish deposits in the macula and paramacular regions, involving both the superior and inferior vascular arcades	OU: round, macular and paramacular hypo- and hyperautofluorescent lesions; OD: lesions on the inferior vascular arcade; OS: lesions on the temporal retinal part of the optic nerve	no	OD more affected than OS	Type 2 (OD), Type 1 (OS)	not performed	none	none
Family 3	CHluga1119 (LUKS002)	S5	F	Switzerland	Russian	proband	dominant	M2	35	OD -0.25, OS -0.25	night vision difficulties	1.25/1.25	OU	yes	Type 3	OU: Macular retinal pigment epithelium changes; medium, round, drusen-like lesions, some greyish, some mildly pigmented, at the posterior pole, involving the nasal part of the optic nerve	OU: mottled macular hypoautofluorescence, with sparing of the paramacular region. Multiple round hypo- and hyperautofluorescent lesions present throughout the posterior pole, extending beyond the vascular arcades and nasally toward the optic disc, sparing the peripapillary area	no	yes	Type 1	not performed	none	none
Family 4	PE48	S6	M	Germany	European	proband	isolated	M2	29	OD: -1.00, OS: -1.00	currently asymptomatic	1.0/1.0	OU	yes	Type 3	Large, round, yellowish deposits in the macula and paramacular regions, with extension into the nasal retina	OU: round, macular and paramacular, hypo- and hyper autofluorescent lesions, with nasal retinal involvement, mottled	no	yes	Type 1	not performed	none	arterial hypertension
Family 5	GC20506	S7	M	UK	not documented	proband	isolated	M2	36	not documented	night vision difficulties (progressive)	0.67/0.67	OU	yes	Type 2	Medium, round to pisciform, yellowish deposits in the macula and paramacular regions	OU: round and pisciform, paramacular, hypofluorescent lesions with the inferior and superior arcades involvement, OD: hyperautofluorescent area	no	OD more affected than OS	Type 3 (OD), Type 2 (OS)	no evidence of generalised retinal dysfunction (OU)	none	none
Family 6	MDS550	S8	F	Germany	European	proband	dominant	M3	38	37yo: OD: -1.00, OS: -0.75; 38yo: OD: -1.25, OS: -0.25	reduced central VA, metamorphopsia	0.8/0.8 (37yo); 0.63/0.8 (38yo)	OU	yes	Type 3	Large, round, yellowish deposits in the macula and paramacular regions, extending into the nasal retina and involving both the superior and inferior vascular arcades	OU: round, macular and paramacular, hypo- and hyperautofluorescent lesions with nasal retinal involvement, with inferior and superior arcades involvement, mottled	no	yes	Type 2	not performed	none	none
Family 7	MEH1 (21-1388/GC29628-I)	S9	F	UK	South Asian (India Gujerati)	proband	dominant	M4	7	OD: -0.62, OS: -0.50	currently asymptomatic	1.0/1.0	OU	OS slightly more affected than OD	Type 1	NA	OU: macular hypoautofluorescent area	no	yes	Type 1	not performed	none	thinning of hair of unspecified cause (2024, resolved); anal fissure (2023, resolved); rectal haemorrhage (2021, resolved); pityriasis alba (2021, resolved); infantile eczema
Family 7	GC29628-II	S10	F	UK	South Asian (India Gujerati)	sister	dominant	M4	11	not documented	difficulty reading	1.0/1.0	OU	yes	Type 2	Medium, round, yellowish deposits in the macula and paramacular regions, involving both the superior and inferior vascular arcades	OU: round to pisciform, macular and paramacular, hypoautofluorescent lesions, involving the superior and inferior vascular arcades	no	yes	Type 1	not performed	myopia	none
Family 7	MEH2 (21-1389/GC29628-III)	S11	M	UK	South Asian (India Gujerati)	father	dominant	M4	unknown	not performed	reduced VA from childhood	not performed	OU	yes	Type 3	NA	OU: round to pisciform, macular and paramacular, hypo- and hyperautofluorescent lesions, with nasal retinal involvement, involving the superior and inferior vascular arcades	no	yes	Type 1	not performed	OD amblyopia and squint surgery at childhood	none
Family 8	MDS428	S12	M	Germany	European	proband	isolated	M4	49	not performed	metamorphopsia	1.0/1.0	OU	yes	Type 3	Large, round to pisciform, yellowish deposits in the macula and paramacular regions, extending into the nasal retina and involving both the superior and inferior vascular arcades	OU: round, macular and paramacular, hypo- and hyperautofluorescent lesions, with nasal retinal involvement, involving the superior and inferior vascular arcades, mottled	no	yes	Type 1	not performed	none	none
Family 9	GC25939	S13	M	UK	European (British)	proband	incomplete penetrance	M5	6	OD: +3.00, OS: +3.38	currently asymptomatic	0.8/1.0	OU	yes	Type 1	Small, pinpoint, yellowish deposits in the macula	OU: macular hypoautofluorescent area	no	yes	Type 1	normal (OU)	fully accomodative esotropia and moderate hyperopia	none
Family 10	MB107	S14	F	Germany	European	proband	isolated	M6	67	OD: +2.75, OS: +3.75	reduced VA, night vision difficulty	0.63/0.63	OU	OD more affected than OS	Type 3 (OD), Type 2 (OS)	Medium and large, round to pisciform, yellowish deposits in the macula and paramacular regions; in the right eye (OD), deposits extend into the nasal retina. In both eyes (OU), involvement of the superior and inferior vascular arcades is observed	OU: round, macular and paramacular, hyperautofluorescent lesions, OS: nasal retinal involvement, involving the superior and inferior vascular arcades	no	yes	Type 2	normal (OU)	none	overweight
Family 11	R1095	S15	F	Israel	Ashkenazi and Yemenite Jewish	proband	isolated	M6	8.5	OD: +4.00, OS: +3.50	currently asymptomatic	1.0/1.0	OU	yes	Type 1	NA	NA	no	yes	Type 1	not performed	none	none
Family 12	GC27679	S16	F	UK	Iranian	proband	isolated	M6	38	not documented	visual distortion (OS)	1.0/1.0	OU	yes	Type 3	Large, round to pisciform, yellowish deposits in the macula and paramacular regions, extending into the nasal retina and involving both the superior and inferior vascular arcades	OU: round, macular and paramacular, hypo- and hyperautofluorescent lesions, with nasal retinal involvement, involving the superior and inferior vascular arcades, mottled	no	yes	Type 1	not performed	acute anterior uveitis (OD)	vitamin D deficiency, thyroidectomy
Family 13	SH01	S17	F	UK	European (British)	proband	isolated	M7	27	not documented	currently asymptomatic	0.67/0.67	OU	yes	Type 2	Large, round to pisciform, yellowish deposits in the macula and paramacular regions, involving both the superior and inferior vascular arcades	OU: round, macular and paramacular, hypoautofluorescent lesions, involving the superior and inferior vascular arcades	no	yes	Type 1	not performed	none	none
Family 14	MDS622	S18	F	Germany	Turkish	proband	not available	M8	57	OD: -0.75, OS: -0.75	reduced VA, night vision difficulty, glare	0.5/1.0	OU	yes	Type 3	Medium, round, yellowish deposits in the macula and paramacular regions, involving both the superior and inferior vascular arcades and extending into the nasal retina (OU)	OU: macular hypoautofluorescence area; OS: round, macular and paramacular, hypo and hyperautofluorescent lesions, with inferior and superior arcades involvement	no	OD more affected than OS	Type 3 (OD), Type 1 (OS)	normal (OU)	OU: incipient corticonuclear cataract	pancreatic cysts
Family 15	R1557	S19	M	Israel	Ashkenazi Jewish	proband	dominant	M9	35	not performed	metamorphopsia, mild night vision difficulty	1.0/1.0	OU	yes	Type 1	NA	OU: macular hypoautofluorescent area; OS: a single round hyperautofluorescent lesion, on the temporal inferior retinal part of the optic nerve	no	OS more affected than OD	Type 1 (OD), Type 2 (OS)	mild photopic and scotopic dysfunction (OU)	none	bronchial asthma, occasional vertigo, mild bilateral hearing loss, osteoporosis
Family 15	R2267	S20	M	Israel	Ashkenazi Jewish	brother	dominant	M9	42	not performed	metamorphopsia	0.33/0.5	OU	yes	Type 3	NA	OU: macular hypoautofluorescent area; pisciform, paramacular, hypo- and hyperautofluorescent lesions with nasal retinal involvement, involving the superior and inferior vascular arcades	no	OD more affected than OS	Type 4 (OD), Type 3 (OS)	mild photopic dysfunction (OU)	none	hydronephrosis at age 14 (treated with surgical drainage), mitral valve prolapse, mild bilateral high frequency hearing loss
Family 16	RPN-328	S21	M	Spain	European	proband	isolated	M10	60	OD: -0.75, OS: -1.25	reduced VA	0.1/0.5	OU	yes	Type 3	Medium, round to pisciform, yellowish deposits in the macula and paramacular regions, extending into the nasal retina and involving both the superior and inferior vascular arcades	OU: patchy, macular and paramacular, hypo- and hyperautofluorescent lesions, with nasal retinal involvement, involving the superior and inferior vascular arcades, mottled	no	OS more affected than OD	Type 1 (OD), Type 2 (OS)	not performed	none	none
M - male, F - female; OU - both eyes, OS - left eye, OD - right eye; NA - not available; VA - visual acuity, BCVA - best corrected Snellen visual acuity, FAF - fundus autofluorescence, OCT - optical coherence tomography, ERG - electroretinography
