# Supplementary material for: Missense variants in KATNA1 alter microtubule dynamics and underlie dominant macular dystrophy
Source: Research Square preprint supplement (doi:10.21203/rs.3.rs-8880283/v1), 2026-07-07
Supplement: Supplementary file 2 [file 9de9e4f6a516e3d42225aa2f.xlsx]

## Sheet: Table S2
Supplementary Table 2: Characteristics of identified variants.
																					Statistical analysis (PS4)
Variant ID	# of patients	# of families	Variant (nucleotide)	Variant (protein)	Variant (genomic, hg19)	Variant (genomic, hg38)	Exon	gnomAD v2.1.1 frequency	gnomAD v2.1.1 # of individuals	gnomAD v4.1.0 frequency	gnomAD v4.1.0 # of individuals	All of Us frequency	All of Us # of individuals	GenomeAsia 100k	MutScore	REVEL	AlphaMissense	GERP++	ACMG classification	ACMG criteria	OR	95% CI, low	95% CI, high	Fisher-test p-value	Bonferroni-corrected p-value
M1	1	1	NM_007044.4:c.766A>G	NP_008975.1:p.(Thr256Ala)	NC_000006.11:g.149922852T>C	NC_000006.12:g.149601716T>C	7	Absent	0	Absent	0	Absent	0	Absent	0.605	0.984	0.9978	5.85	LP	PP3_strong, PM2_supp, PM5_mod	NA	NA	NA	NA	NA
M2	6	4	NM_007044.4:c.767C>T	NP_008975.1:p.(Thr256Met)	NC_000006.11:g.149922851G>A	NC_000006.12:g.149601715G>A	7	Absent	0	1.863e-06	3	Absent	0	Absent	0.73	0.948	0.9933	5.85	P	PP3_strong, PP1_supp, PS4_strong	647.28	130.52	3210.07	7.35e-08	7.35e-07
M3	1	1	NM_007044.4:c.1112G>A	NP_008975.1:p.(Arg371Gln)	NC_000006.11:g.149918681C>T	NC_000006.12:g.149597545C>T	9	Absent	0	Absent	0	1e-06	1	Absent	0.912	0.876	0.9823	4.91	VUS	PP3_mod	NA	NA	NA	NA	NA
M4	4	2	NM_007044.4:c.1114C>T	NP_008975.1:p.(Arg372Cys)	NC_000006.11:g.149918679G>A	NC_000006.12:g.149597543G>A	9	Absent	0	Absent	0	Absent	0	Absent	0.928	0.9892	0.947	5.78	P	PP3_strong, PM2_supp, PP1_supp, PS4_strong	3232.53	155.11	67400	2.39e-06	2.39e-05
M5	1	1	NM_007044.4:c.1115G>A	NP_008975.1:p.(Arg372His)	NC_000006.11:g.149918678C>T	NC_000006.12:g.149597542C>T	9	Absent	0	1.239e-06	2	Absent	0	Absent	0.845	0.99	0.982	5.65	LP	PP3_strong, PM5_mod	NA	NA	NA	NA	NA
M6	3	3	NM_007044.4:c.1127G>A	NP_008975.1:p.(Arg376Gln)	NC_000006.11:g.149918666C>T	NC_000006.12:g.149597530C>T	9	3.978e-06	1	6.196e-07	1	Absent	0	Absent	0.903	0.846	0.8969	4.91	LP	PP3_mod, PS4_strong	1941.85	201.85	18700	1.47e-08	1.47e-07
M7	1	1	NM_007044.4:c.1127G>C	NP_008975.1:p.(Arg376Pro)	NC_000006.11:g.149918666C>G	NC_000006.12:g.149597530C>G	9	Absent	0	6.196e-07	1	Absent	0	Absent	0.967	0.934	0.9983	4.91	VUS	PP3_strong, PM5_supp	NA	NA	NA	NA	NA
M8	1	1	NM_007044.4:c.1127G>T	NP_008975.1:p.(Arg376Leu)	NC_000006.11:g.149918666C>A	NC_000006.12:g.149597530C>A	9	Absent	0	Absent	0	Absent	0	Absent	0.956	0.904	0.9683	4.91	VUS	PP3_mod, PM2_supp, PM5_supp	NA	NA	NA	NA	NA
M9	2	1	NM_007044.4:c.1253G>A	NP_008975.1:p.(Gly418Asp)	NC_000006.11:g.149918223C>T	NC_000006.12:g.149597087C>T	10	Absent	0	Absent	0	Absent	0	Absent	0.879	0.981	0.9987	5.67	LP	PP3_strong, PM2_supp, PP1_supp	NA	NA	NA	NA	NA
M10	1	1	NM_007044.4:c.1279G>C	NP_008975.1:p.(Asp427His)	NC_000006.11:g.149916369C>G	NC_000006.12:g.149595233C>G	11	Absent	0	Absent	0	Absent	0	Absent	0.849	0.94	0.9932	5.71	VUS	PP3_strong, PM2_supp	NA	NA	NA	NA	NA
P - pathogenic, LP - likely pathogenic, VUS - variant of uncertain significance; mod - moderate, supp - supporting; OR - odds ratio, CI - confidence interval
